# Supplementary material
Source: publisher figshare collection journal article supplement (https://acs.figshare.com/ndownloader/files/5708481)
Supplement: Supplementary file 1 [file 5708481]

# ic9708428.cif

data_[H2LCu(SCN)2].(ClO4)2.3H2O

_audit_creation_method            SHELXL
_chemical_name_systematic
;
 ?
;
_chemical_name_common             ?
_chemical_formula_moiety
;
Cu 2+, C27 H 39 N7 2+, (S C N 1-)2, (Cl O4 -1)2, (H2 O)3
;
_chemical_formula_structural
;
(Cu) (C27 H39 N7) (S C N)2 (Cl O4)2 (H2 O)3
;
_chemical_formula_analytical      ?
_chemical_formula_sum             'C29 H45 Cl2 Cu N9 O11 S2'
_chemical_formula_weight          894.30
_chemical_melting_point           ?
_chemical_compound_source         ?

loop_
 _atom_type_symbol
 _atom_type_description
 _atom_type_scat_dispersion_real
 _atom_type_scat_dispersion_imag
 _atom_type_scat_source
 'C'  'C'   0.0033   0.0016
 'International Tables Vol C Tables 4.2.6.8 and 6.1.1.4'
 'H'  'H'   0.0000   0.0000
 'International Tables Vol C Tables 4.2.6.8 and 6.1.1.4'
 'N'  'N'   0.0061   0.0033
 'International Tables Vol C Tables 4.2.6.8 and 6.1.1.4'
 'O'  'O'   0.0106   0.0060
 'International Tables Vol C Tables 4.2.6.8 and 6.1.1.4'
 'S'  'S'   0.1246   0.1234
 'International Tables Vol C Tables 4.2.6.8 and 6.1.1.4'
 'Cu'  'Cu'   0.3201   1.2651
 'International Tables Vol C Tables 4.2.6.8 and 6.1.1.4'
 'Cl'  'Cl'   0.1484   0.1585
 'International Tables Vol C Tables 4.2.6.8 and 6.1.1.4'

_symmetry_cell_setting            'triclinic'
_symmetry_space_group_name_H-M    'P -1'

loop_
 _symmetry_equiv_pos_as_xyz
 'x, y, z'
 '-x, -y, -z'

_cell_length_a                    9.770(10)
_cell_length_b                    12.027(5)
_cell_length_c                    18.006(7)
_cell_angle_alpha                 106.87(3)
_cell_angle_beta                  90.22(8)
_cell_angle_gamma                 104.48(8)
_cell_volume                      1953.7(23)
_cell_formula_units_Z             2
_cell_measurement_temperature     298 K
_cell_measurement_reflns_used     25
_cell_measurement_theta_min       5.10
_cell_measurement_theta_max       9.56

_exptl_crystal_description        'prismatic'
_exptl_crystal_colour             'blue'
_exptl_crystal_size_max           0.2
_exptl_crystal_size_mid           0.17
_exptl_crystal_size_min           0.06
_exptl_crystal_density_meas       ?
_exptl_crystal_density_diffrn     1.520
_exptl_crystal_density_method     ?
_exptl_crystal_F_000              930
_exptl_absorpt_coefficient_mu     0.870
_exptl_absorpt_correction_type    'refdelf (Walker and Stuart, 1983)'
_exptl_absorpt_correction_T_min   ?
_exptl_absorpt_correction_T_max   ?

_exptl_special_details
;
 ?
;

_diffrn_ambient_temperature       298 K
_diffrn_radiation_wavelength      0.71069
_diffrn_radiation_type            MoK\a
_diffrn_radiation_source          'X-ray tube'
_diffrn_radiation_monochromator   graphite
_diffrn_measurement_device        'ENRAF-NONIUS CAD4'
_diffrn_measurement_method        '\q/2\q'
_diffrn_standards_number          2
_diffrn_standards_interval_count  ?
_diffrn_standards_interval_time   60
_diffrn_standards_decay_%         0
_diffrn_reflns_number             3804
_diffrn_reflns_av_R_equivalents   0.0852
_diffrn_reflns_av_sigmaI/netI     0.2311
_diffrn_reflns_limit_h_min        -9
_diffrn_reflns_limit_h_max        9
_diffrn_reflns_limit_k_min        -11
_diffrn_reflns_limit_k_max        11
_diffrn_reflns_limit_l_min        0
_diffrn_reflns_limit_l_max        17
_diffrn_reflns_theta_min          2.52
_diffrn_reflns_theta_max          20.00
_reflns_number_total              3648
_reflns_number_observed           1620
_reflns_observed_criterion        >2sigma(I)

_computing_data_collection        'ENRAF-NONIUS CAD4'
_computing_cell_refinement        'ENRAF-NONIUS CAD4'
_computing_data_reduction         'ENRAF-NONIUS CAD4'
_computing_structure_solution     'Patterson method'
_computing_structure_refinement   'SHELXL-93 (Sheldrick, 1993)'
_computing_molecular_graphics     'ORTEP (Johnson, 1971)'
_computing_publication_material   'PARST93 (Nardelli, 1983)'

_refine_special_details
;
 Refinement on F^2^ for ALL reflections except for 2 with very negative F^2^
 or flagged by the user for potential systematic errors.  Weighted R-factors
 wR and all goodnesses of fit S are based on F^2^, conventional R-factors R
 are based on F, with F set to zero for negative F^2^. The observed criterion
 of F^2^ > 2sigma(F^2^) is used only for calculating _R_factor_obs etc. and is
 not relevant to the choice of reflections for refinement.  R-factors based
 on F^2^ are statistically about twice as large as those based on F, and R-
 factors based on ALL data will be even larger.
;

_refine_ls_structure_factor_coef  Fsqd
_refine_ls_matrix_type            full
_refine_ls_weighting_scheme
 'calc w=1/[\s^2^(Fo^2^)+(0.0813P)^2^+7.9685P] where P=(Fo^2^+2Fc^2^)/3'
_atom_sites_solution_primary      heavy
_atom_sites_solution_secondary    difmap
_atom_sites_solution_hydrogens    geom
_refine_ls_hydrogen_treatment     refU
_refine_ls_extinction_method      none
_refine_ls_extinction_coef        ?
_refine_ls_number_reflns          3646
_refine_ls_number_parameters      509
_refine_ls_number_restraints      0
_refine_ls_R_factor_all           0.2313
_refine_ls_R_factor_obs           0.0971
_refine_ls_wR_factor_all          0.2553
_refine_ls_wR_factor_obs          0.1832
_refine_ls_goodness_of_fit_all    1.055
_refine_ls_goodness_of_fit_obs    1.252
_refine_ls_restrained_S_all       1.059
_refine_ls_restrained_S_obs       1.252
_refine_ls_shift/esd_max          0.679
_refine_ls_shift/esd_mean         0.109

loop_
 _atom_site_label
 _atom_site_type_symbol
 _atom_site_fract_x
 _atom_site_fract_y
 _atom_site_fract_z
 _atom_site_U_iso_or_equiv
 _atom_site_thermal_displace_type
 _atom_site_occupancy
 _atom_site_calc_flag
 _atom_site_refinement_flags
 _atom_site_disorder_group
O1 O 0.3892(14) -0.4180(11) 0.0262(7) 0.085(4) Uani 1 d . .
O2 O 1.3053(17) 1.0361(14) 0.7773(11) 0.151(7) Uani 1 d . .
O3 O 0.5368(20) -0.1897(13) 0.0416(13) 0.193(9) Uani 1 d . .
Cu Cu 0.8561(2) 0.3313(2) 0.62758(13) 0.0490(7) Uani 1 d . .
S1 S 0.6845(6) 0.6609(4) 0.6447(3) 0.083(2) Uani 1 d . .
N8 N 0.8128(14) 0.4777(11) 0.6305(8) 0.055(5) Uani 1 d . .
C28 C 0.7624(22) 0.5510(17) 0.6332(11) 0.072(7) Uani 1 d . .
S2 S 0.5445(5) 0.1335(4) 0.3966(3) 0.069(2) Uani 1 d . .
N9 N 0.7133(17) 0.2349(12) 0.5361(8) 0.077(5) Uani 1 d . .
C29 C 0.6426(16) 0.1901(14) 0.4806(11) 0.050(5) Uani 1 d . .
Cl1 Cl 0.3620(7) 0.0548(6) 0.1354(4) 0.093(2) Uani 1 d . .
O11 O 0.4532(31) 0.0790(25) 0.2000(14) 0.152(11) Uani 0.66 d P .
O12 O 0.3212(35) -0.0679(22) 0.1252(22) 0.193(15) Uani 0.66 d P .
O13 O 0.2300(42) 0.0690(45) 0.1646(22) 0.255(21) Uani 0.66 d P .
O14 O 0.3017(55) 0.0928(37) 0.0892(28) 0.271(22) Uani 0.66 d P .
O15 O 0.4480(44) 0.0242(41) 0.0764(17) 0.270(19) Uani 0.66 d P ..
O16 O 0.4223(60) 0.1618(55) 0.1573(49) 0.393(43) Uani 0.66 d P .
Cl2 Cl 0.2207(7) 0.3583(7) 0.8250(4) 0.108(2) Uani 1 d . .
O21 O 0.3384(21) 0.3831(29) 0.8718(12) 0.274(16) Uani 1 d . .
O22 O 0.2476(30) 0.3714(23) 0.7563(10) 0.263(14) Uani 1 d . .
O23 O 0.1528(28) 0.4310(21) 0.8626(17) 0.276(14) Uani 1 d . ..
O24 O 0.1504(33) 0.2325(20) 0.8054(18) 0.295(16) Uani 1 d . .
N1 N 0.9923(16) 0.7172(12) 0.9417(8) 0.063(4) Uani 1 d . .
C1 C 1.0299(19) 0.8425(15) 0.9401(11) 0.073(6) Uani 1 d . .
H1A H 1.0323(19) 0.8949(15) 0.9927(11) 0.034(7) Uiso 1 calc R .
H1B H 0.9558(19) 0.8533(15) 0.9089(11) 0.034(7) Uiso 1 calc R .
C2 C 1.1700(20) 0.8818(15) 0.9080(10) 0.070(6) Uani 1 d . .
H2A H 1.1891(20) 0.9677(15) 0.9158(10) 0.034(7) Uiso 1 calc R .
H2B H 1.2428(20) 0.8702(15) 0.9396(10) 0.034(7) Uiso 1 calc R .
N2 N 1.1884(15) 0.8229(12) 0.8242(7) 0.055(4) Uani 1 d . .
C3 C 1.0580(19) 0.7921(14) 0.7721(10) 0.064(6) Uani 1 d . .
H3A H 1.0273(19) 0.8641(14) 0.7759(10) 0.034(7) Uiso 1 calc R .
H3B H 0.9826(19) 0.7357(14) 0.7875(10) 0.034(7) Uiso 1 calc R .
C4 C 1.0881(18) 0.7372(15) 0.6902(10) 0.064(6) Uani 1 d . .
H4A H 1.0050(18) 0.7212(15) 0.6552(10) 0.034(7) Uiso 1 calc R .
H4B H 1.1655(18) 0.7927(15) 0.6753(10) 0.034(7) Uiso 1 calc R ..
N3 N 1.1257(14) 0.6258(11) 0.6839(8) 0.052(4) Uani 1 d . .
C5 C 1.2592(18) 0.6563(15) 0.7308(9) 0.061(6) Uani 1 d . .
H5A H 1.3311(18) 0.7138(15) 0.7141(9) 0.034(7) Uiso 1 calc R .
H5B H 1.2919(18) 0.5847(15) 0.7251(9) 0.034(7) Uiso 1 calc R .
C6 C 1.2329(19) 0.7101(15) 0.8143(10) 0.063(6) Uani 1 d . .
H6A H 1.1595(19) 0.6526(15) 0.8301(10) 0.034(7) Uiso 1 calc R .
H6B H 1.3189(19) 0.7275(15) 0.8475(10) 0.034(7) Uiso 1 calc R .
C7 C 1.1378(19) 0.5664(14) 0.6008(10) 0.068(6) Uani 1 d . .
H7A H 1.2106(19) 0.6192(14) 0.5812(10) 0.034(7) Uiso 1 calc R .
H7B H 1.0486(19) 0.5522(14) 0.5713(10) 0.034(7) Uiso 1 calc R .
C8 C 1.1744(22) 0.4487(16) 0.5896(9) 0.058(6) Uani 1 d . .
C9 C 1.3066(21) 0..4380(16) 0.5653(12) 0.072(6) Uani 1 d . .
H9 H 1.3740 0.5032 0.5582 0.050 Uiso 1 calc . .
C10 C 1.3342(20) 0.3270(21) 0.5522(11) 0.080(7) Uani 1 d . .
H10 H 1.4203 0.3175 0.5333 0.050 Uiso 1 calc . .
C11 C 1.2407(19) 0.2294(16) 0.5657(9) 0.050(5) Uani 1 d . .
C12 C 1.1128(17) 0.2536(15) 0.5896(8) 0.038(4) Uani 1 d . .
N4 N 1.0780(13) 0.3564(12) 0.6012(7) 0.043(4) Uani 1 d . .
C13 C 1..2674(20) 0.1176(18) 0.5570(10) 0.071(6) Uani 1 d . .
H13 H 1.3512 0.1034 0.5371 0.050 Uiso 1 calc . .
C14 C 1.1732(21) 0.0295(17) 0.5770(11) 0.071(6) Uani 1 d . .
H14 H 1.1931 -0.0436 0.5732 0.050 Uiso 1 calc . .
C15 C 1.0420(19) 0..0519(15) 0.6043(9) 0.049(5) Uani 1 d . .
C16 C 1.0115(18) 0.1617(15) 0.6114(9) 0.043(5) Uani 1 d . .
N5 N 0.8924(15) 0.1865(11) 0.6397(8) 0.047(4) Uani 1 d . .
C17 C 0.8017(20) 0.1104(14) 0.6653(10) 0.055(6) Uani 1 d . .
C18 C 0.8228(18) -0.0042(14) 0.6620(11) 0.058(5) Uani 1 d . .
H18 H 0.7576 -0.0581 0.6809 0.050 Uiso 1 calc . .
C19 C 0.9400(21) -0.0323(15) 0.6306(10) 0.060(6) Uani 1 d . .
H19 H 0.9540 -0.1076 0.6262 0.050 Uiso 1 calc . .
C20 C 0.6744(17) 0.1540(12) 0.6954(9) 0.048(5) Uani 1 d . .
H20A H 0.5988(17) 0.1266(12) 0.6540(9) 0.034(7) Uiso 1 calc R .
H20B H 0.6399(17) 0.1217(12) 0.7373(9) 0.034(7) Uiso 1 calc R .
N6 N 0.7167(13) 0.2883(11) 0.7243(7) 0.047(4) Uani 1 d . .
C21 C 0.8052(15) 0.3274(13) 0.7995(9) 0.043(5) Uani 1 d . .
H21A H 0.8908(15) 0.3001(13) 0.7912(9) 0.034(7) Uiso 1 calc R .
H21B H 0.7530(15) 0.2914(13) 0.8361(9) 0.034(7) Uiso 1 calc R .
C22 C 0.8443(17) 0.4629(13) 0.8329(10) 0.052(5) Uani 1 d . .
H22A H 0.9110(17) 0.4884(13) 0.8785(10) 0.034(7) Uiso 1 calc R .
H22B H 0.8882(17) 0.4999(13) 0.7947(10) 0.034(7) Uiso 1 calc R .
C23 C 0.6138(15) 0.4614(13) 0.7820(10) 0.051(5) Uani 1 d . .
H23A H 0.5243(15) 0.4801(13) 0.7954(10) 0.034(7) Uiso 1 calc R .
H23B H 0.6552(15) 0.5052(13) 0.7465(10) 0.034(7) Uiso 1 calc R .
C24 C 0.5892(17) 0.3313(16) 0.7443(10) 0.062(6) Uani 1 d . .
H24A H 0.5279(17) 0.3091(16) 0.6969(10) 0.034(7) Uiso 1 calc R .
H24B H 0.5384(17) 0.2892(16) 0.7786(10) 0.034(7) Uiso 1 calc R .
N7 N 0.7122(13) 0.4993(11) 0.8545(7) 0.043(4) Uani 1 d . .
C25 C 0.7398(18) 0.6337(15) 0.8895(10) 0.065(6) Uani 1 d . .
H25A H 0.7774(18) 0.6726(15) 0.8509(10) 0.034(7) Uiso 1 calc R .
H25B H 0.6507(18) 0.6531(15) 0.9030(10) 0.034(7) Uiso 1 calc R .
C26 C 0.8425(21) 0.6831(16) 0.9612(11) 0.080(7) Uani 1 d . .
H26A H 0.8198(21) 0.7533(16) 0.9959(11) 0.034(7) Uiso 1 calc R .
H26B H 0.8322(21) 0.6230(16) 0.9883(11) 0.034(7) Uiso 1 calc R .
C27 C 1.0887(20) 0.7037(16) 1.0010(11) 0.088(7) Uani 1 d . .
H27A H 1.1849(22) 0.7252(64) 0.9879(25) 0.045(24) Uiso 1 calc R .
H27B H 1.0638(54) 0.6217(22) 1.0018(32) 0.045(24) Uiso 1 calc R .
H27C H 1.0793(60) 0.7557(52) 1.0513(12) 0.045(24) Uiso 1 calc R .

loop_
 _atom_site_aniso_label
 _atom_site_aniso_U_11
 _atom_site_aniso_U_22
 _atom_site_aniso_U_33
 _atom_site_aniso_U_23
 _atom_site_aniso_U_13
 _atom_site_aniso_U_12
O1 0.108(11) 0.089(9) 0.058(8) 0.034(7) 0.015(8) 0.013(8)
O2 0.106(13) 0.136(14) 0.194(18) 0.067(13) 0.013(12) -0.021(11)
O3 0.211(19) 0.076(11) 0.284(23) 0.056(13) 0.119(18) 0.020(12)
Cu 0.0560(15) 0.0403(12) 0.0532(14) 0.0149(11) 0.0015(12) 0.0158(11)
S1 0.092(4) 0.054(3) 0.114(5) 0.033(3) 0.011(4) 0.031(3)
N8 0.069(10) 0.035(9) 0.061(10) 0.010(8) 0.003(8) 0.017(8)
C28 0.094(16) 0.065(14) 0.054(13) 0.028(12) 0.011(12) 0.001(13)
S2 0.060(3) 0.079(4) 0.059(4) 0.013(3) -0.004(3) 0.011(3)
N9 0.105(13) 0.058(10) 0.055(11) 0.009(9) -0.041(10) 0.007(9)
C29 0.033(10) 0.047(11) 0.077(14) 0.018(10) 0.037(10) 0.021(9)
Cl1 0.102(5) 0.084(4) 0.076(5) 0.012(4) 0.004(4) 0.010(4)
O11 0.189(25) 0.166(24) 0.080(16) 0.056(16) -0.072(18) -0.014(20)
O12 0.190(30) 0.065(17) 0.273(41) 0.027(21) 0.009(28) -0.029(19)
O13 0.184(34) 0.414(60) 0.162(34) 0.051(37) 0.018(29) 0.114(38)
O14 0.367(50) 0.222(35) 0.279(44) 0.099(35) -0.109(44) 0.147(37)
O15 0.396(41) 0.407(50) 0.092(22) 0.060(26) 0.167(27) 0.272(40)
O16 0.223(57) 0.291(65) 0.548(117) 0.029(70) -0.100(65) -0.028(50)
Cl2 0.077(4) 0.161(6) 0.091(5) 0.048(4) -0.005(4) 0.028(4)
O21 0.096(15) 0.562(45) 0.115(17) 0.049(22) 0.006(13) 0.061(21)
O22 0.398(36) 0.287(26) 0.060(12) 0.082(15) -0.049(17) -0.023(25)
O23 0.320(26) 0.244(21) 0.302(34) 0.006(21) 0.061(25) 0.230(20)
O24 0..379(37) 0.114(17) 0.339(35) 0.063(21) -0.073(30) -0.022(21)
N1 0.094(12) 0.049(9) 0.055(10) 0.020(8) 0.022(9) 0.030(9)
C1 0.078(14) 0.058(13) 0.074(15) -0..008(11) 0.019(12) 0.033(11)
C2 0.087(15) 0.057(12) 0.050(13) -0.005(10) -0.024(12) 0.013(11)
N2 0.078(11) 0.058(9) 0.035(9) 0.022(8) -0.001(8) 0.018(8)
C3 0.085(14) 0.033(10) 0.069(14) 0.011(10) -0.006(12) 0.012(10)
C4 0.064(13) 0.067(12) 0.072(14) 0.040(11) 0.008(11) 0.015(11)
N3 0.046(9) 0.047(9) 0.059(10) 0.014(8) -0.003(8) 0.005(7)
C5 0.060(13) 0.066(12) 0.057(13) 0.022(11) 0.017(11) 0.013(10)
C6 0.064(13) 0.063(13) 0.060(14) 0.028(11) -0.010(11) 0.000(11)
C7 0.066(14) 0.059(12) 0.071(15) 0.045(11) -0.001(11) -0.026(11)
C8 0.100(16) 0.054(12) 0.026(11) 0.013(9) 0.005(11) 0.028(12)
C9 0.063(14) 0.055(12) 0.099(16) 0.042(12) -0.005(13) -0.006(11)
C10 0.056(13) 0.127(18) 0.067(14) 0.054(14) 0.031(11) 0.015(14)
C11 0.066(13) 0.058(12) 0.029(11) 0.010(9) -0.002(10) 0..027(11)
C12 0.047(11) 0.066(12) 0.011(9) 0.008(8) 0.015(8) 0.034(10)
N4 0.044(9) 0.041(9) 0.035(9) 0.009(7) 0.005(7) -0.001(8)
C13 0.090(15) 0.089(15) 0.055(14) 0.022(12) 0.027(12) 0.060(13)
C14 0.085(15) 0.085(14) 0.055(14) 0.014(11) -0.007(12) 0.051(12)
C15 0.072(13) 0.060(12) 0.027(11) 0.014(9) -0.002(10) 0.037(11)
C16 0.052(12) 0.055(12) 0.024(10) 0.015(9) -0.002(9) 0.014(10)
N5 0.050(9) 0.032(8) 0.052(10) -0.001(7) -0.008(8) 0.014(8)
C17 0.075(14) 0.016(10) 0.057(13) -0.003(9) -0.007(11) -0.004(10)
C18 0.055(12) 0.036(10) 0.098(15) 0.047(10) 0.002(11) 0.006(9)
C19 0.088(15) 0.051(12) 0.043(12) 0.014(10) -0.016(11) 0.021(12)
C20 0.062(12) 0.028(10) 0.056(12) 0.020(9) -0.004(10) 0.006(9)
N6 0.049(9) 0.047(9) 0.050(9) 0.019(7) 0.005(8) 0.016(7)
C21 0.027(9) 0.053(11) 0.058(12) 0.034(9) 0.004(9) 0.008(8)
C22 0.056(12) 0.037(11) 0.044(11) 0.003(9) -0.010(10) -0.012(9)
C23 0.027(10) 0.046(11) 0.073(13) 0.008(10) 0.003(10) 0.008(9)
C24 0.047(12) 0.102(15) 0.046(12) 0.037(11) 0.007(10) 0.020(11)
N7 0.039(9) 0.028(8) 0.046(9) -0.004(7) -0.009(7) 0.001(7)
C25 0.053(12) 0.085(14) 0.058(14) 0.020(12) 0.016(11) 0.021(11)
C26 0.123(18) 0.065(13) 0.061(15) 0.013(11) 0.043(14) 0.046(13)
C27 0.112(17) 0.083(14) 0.078(15) 0.038(13) -0.003(14) 0.026(13)

_geom_special_details
;
 All esds (except the esd in the dihedral angle between two l.s. planes)
 are estimated using the full covariance matrix.  The cell esds are taken
 into account individually in the estimation of esds in distances, angles
 and torsion angles; correlations between esds in cell parameters are only
 used when they are defined by crystal symmetry.  An approximate (isotropic)
 treatment of cell esds is used for estimating esds involving l.s. planes.
;

loop_
 _geom_bond_atom_site_label_1
 _geom_bond_atom_site_label_2
 _geom_bond_distance
 _geom_bond_site_symmetry_2
 _geom_bond_publ_flag
Cu N8 1.897(14) . ?
Cu N5 1.932(13) . ?
Cu N9 2.017(14) . ?
Cu N4 2.187(13) . ?
Cu N6 2.312(13) . ?
S1 C28 1.65(2) . ?
N8 C28 1.10(2) . ?
S2 C29 1.65(2) . ?
N9 C29 1.12(2) . ?
Cl1 O16 1.22(6) . ?
Cl1 O14 1.26(4) . ?
Cl1 O11 1.38(2) . ?
Cl1 O15 1.38(3) . ?
Cl1 O12 1.39(2) . ?
Cl1 O13 1..43(4) . ?
O11 O16 1.51(8) . ?
O13 O14 1.60(6) . ?
O14 O16 1.58(7) . ?
O14 O15 1.81(5) . ?
Cl2 O23 1.27(2) . ?
Cl2 O22 1.31(2) . ?
Cl2 O21 1.34(2) . ?
Cl2 O24 1.43(2) . ?
N1 C1 1.47(2) . ?
N1 C26 1.49(2) . ?
N1 C27 1.49(2) . ?
C1 C2 1.51(2) . ?
C2 N2 1.50(2) . ?
N2 C3 1.48(2) . ?
N2 C6 1.49(2) . ?
C3 C4 1.49(2) . ?
C4 N3 1.45(2) . ?
N3 C5 1.46(2) . ?
N3 C7 1.48(2) . ?
C5 C6 1.51(2) . ?
C7 C8 1.50(2) . ?
C8 N4 1.33(2) . ?
C8 C9 1.39(2) . ?
C9 C10 1.38(3) . ?
C10 C11 1.38(2) . ?
C11 C13 1.40(2) . ?
C11 C12 1.39(2) . ?
C12 N4 1.32(2) . ?
C12 C16 1.44(2) . ?
C13 C14 1.36(2) . ?
C14 C15 1.43(2) . ?
C15 C16 1.39(2) . ?
C15 C19 1.42(2) . ?
C16 N5 1.34(2) . ?
N5 C17 1.30(2) .. ?
C17 C18 1.43(2) . ?
C17 C20 1.51(2) . ?
C18 C19 1.35(2) . ?
C20 N6 1.49(2) . ?
N6 C24 1.47(2) . ?
N6 C21 1.49(2) . ?
C21 C22 1.51(2) . ?
C22 N7 1..48(2) . ?
C23 C24 1.47(2) . ?
C23 N7 1.50(2) . ?
N7 C25 1.51(2) . ?
C25 C26 1.51(2) . ?

loop_
 _geom_angle_atom_site_label_1
 _geom_angle_atom_site_label_2
 _geom_angle_atom_site_label_3
 _geom_angle
 _geom_angle_site_symmetry_1
 _geom_angle_site_symmetry_3
 _geom_angle_publ_flag
N8 Cu N5 171.8(6) .. . ?
N8 Cu N9 92.8(6) . . ?
N5 Cu N9 91.4(5) . . ?
N8 Cu N4 105.3(6) . . ?
N5 Cu N4 79.1(6) . . ?
N9 Cu N4 115.0(6) . . ?
N8 Cu N6 97.6(5) . . ?
N5 Cu N6 74.9(6) . . ?
N9 Cu N6 97.5(6) . . ?
N4 Cu N6 138.6(5) . . ?
C28 N8 Cu 166.7(16) . . ?
N8 C28 S1 175.3(19) . . ?
C29 N9 Cu 171.7(16) . . ?
N9 C29 S2 175.5(17) . . ?
O16 Cl1 O14 79.0(36) . . ?
O16 Cl1 O11 70.6(36) . . ?
O14 Cl1 O11 149.3(24) . . ?
O16 Cl1 O15 96.0(40) . . ?
O14 Cl1 O15 86.0(28) . . ?
O11 Cl1 O15 100.9(22) . . ?
O16 Cl1 O12 164.0(39) . . ?
O14 Cl1 O12 116.9(25) . . ?
O11 Cl1 O12 93.7(19) . . ?
O15 Cl1 O12 83.9(22) . . ?
O16 Cl1 O13 95.2(37) . . ?
O14 Cl1 O13 72.5(26) . . ?
O11 Cl1 O13 105.6(21) . . ?
O15 Cl1 O13 153.4(23) . . ?
O12 Cl1 O13 91.7(24) . . ?
Cl1 O11 O16 49.7(22) . . ?
Cl1 O13 O14 49.1(19) . . ?
Cl1 O14 O16 49.2(29) . . ?
Cl1 O14 O13 58.4(24) . . ?
O16 O14 O13 76.1(38) . . ?
Cl1 O14 O15 49.7(18) . . ?
O16 O14 O15 69.3(33) . . ?
O13 O14 O15 106.6(31) . . ?
Cl1 O15 O14 44.3(18) . . ?
Cl1 O16 O11 59.7(34) . . ?
Cl1 O16 O14 51.8(25) . . ?
O11 O16 O14 111.4(44) . . ?
O23 Cl2 O22 112.1(19) . . ?
O23 Cl2 O21 103.8(17) . . ?
O22 Cl2 O21 113.0(16) . . ?
O23 Cl2 O24 116.7(20) . . ?
O22 Cl2 O24 101.9(17) . . ?
O21 Cl2 O24 109.7(19) . . ?
C1 N1 C26 109.6(14) . . ?
C1 N1 C27 109.7(14) . . ?
C26 N1 C27 109.7(14) . . ?
N1 C1 C2 114.8(15) . . ?
N2 C2 C1 119.1(14) . . ?
C3 N2 C6 107.6(12) . . ?
C3 N2 C2 113.2(14) . . ?
C6 N2 C2 111.4(13) . . ?
N2 C3 C4 109.1(15) . . ?
N3 C4 C3 109.6(14) . . ?
C4 N3 C5 107.5(13) . . ?
C4 N3 C7 108.2(14) . . ?
C5 N3 C7 112.0(13) . . ?
N3 C5 C6 107.5(14) . . ?
N2 C6 C5 110.6(14) . . ?
N3 C7 C8 111.3(14) . . ?
N4 C8 C9 121.7(17) . . ?
N4 C8 C7 119.3(17) .. . ?
C9 C8 C7 119.1(17) . . ?
C10 C9 C8 117.5(17) . . ?
C11 C10 C9 123.4(18) . . ?
C10 C11 C13 125.2(19) . . ?
C10 C11 C12 112.4(17) . . ?
C13 C11 C12 122.4(17) . . ?
N4 C12 C11 127.2(16) . . ?
N4 C12 C16 115.2(15) . . ?
C11 C12 C16 117.3(16) . . ?
C12 N4 C8 117.7(15) . . ?
C12 N4 Cu 109.4(10) . . ?
C8 N4 Cu 132.7(13) . . ?
C14 C13 C11 121.2(18) . . ?
C13 C14 C15 118.2(17) . . ?
C16 C15 C19 115.9(16) . . ?
C16 C15 C14 121.6(17) . . ?
C19 C15 C14 122.3(17) . . ?
N5 C16 C15 122.7(16) . . ?
N5 C16 C12 118.1(16) . . ?
C15 C16 C12 119.2(17) . . ?
C17 N5 C16 120.9(15) . . ?
C17 N5 Cu 123.1(13) . . ?
C16 N5 Cu 115.6(12) . . ?
N5 C17 C18 121.3(18) . . ?
N5 C17 C20 113.5(15) . . ?
C18 C17 C20 125.1(16) . . ?
C19 C18 C17 118.3(17) . . ?
C18 C19 C15 120.7(16) . . ?
N6 C20 C17 108.9(12) . . ?
C24 N6 C21 104.8(12) . . ?
C24 N6 C20 108.9(12) . . ?
C21 N6 C20 108.8(11) . . ?
C24 N6 Cu 123.4(10) . . ?
C21 N6 Cu 110..0(9) . . ?
C20 N6 Cu 100.5(9) . . ?
N6 C21 C22 110.6(12) . . ?
N7 C22 C21 107.7(12) . . ?
C24 C23 N7 109.6(13) . . ?
C23 C24 N6 116.0(13) . . ?
C22 N7 C23 108.4(12) . . ?
C22 N7 C25 112.0(12) . . ?
C23 N7 C25 108.0(12) . . ?
C26 C25 N7 112.8(14) . . ?
N1 C26 C25 112.0(15) . . ?

_refine_diff_density_max    0.802
_refine_diff_density_min   -0.376
_refine_diff_density_rms    0.090
